# Supplementary material for: Male Circumcision and the Epidemic Emergence of HIV-2 in West Africa
Source: PLoS One. 2016 Dec 7;11(12):e0166805. doi: 10.1371/journal.pone.0166805 (PMC5142780; doi:10.1371/journal.pone.0166805)
Supplement: S1 Dataset — (XLSX) [file pone.0166805.s003.xlsx]

## Sheet: Folha1
Male Circumcision and the Epidemic Emergence of HIV-2 in West Africa
João Dinis Sousa, Marina Padrão Temudo, Barry Stephen Hewlett, Ricardo Jorge Camacho, Viktor Müller, Anne-Mieke Vandamme, 2016
Supporting Information S1 Dataset: HIV-2 prevalence rates
HIV-2 PREVALENCE RATES IN WEST AFRICA, 1985-91
INDEX
PART I	EXPLANATION
PART II	PREVALENCE RATES IN CITIES, ADULT COHORTS WITHOUT SPECIFIC RISK FACTORS
PART III	TOTALS PER COUNTRY
PART IV	PREVALENCE RATES IN COMMERCIAL SEX WORKERS COHORTS
PART V	TOTALS INCLUDING CSWs AND RATIO OF PREVALENCE EXCLUDING CSWs/INCLUDING CSWs
PART VI	REFERENCES
PART I	EXPLANATION
We excluded serological studies focusing on CSWs, STD patients, or TB and other hospitalized patients, or made in countries not relevant to our investigation of HIV-2 initial emergence. We considered only studies where sera was collected in the period 1985–91. We focused only on the West African countries most relevant to a discussion of HIV-2 origins. We worked mainly with the Rémy (1993) review…
PART II	PREVALENCE RATES IN CITIES, ADULT COHORTS WITHOUT SPECIFIC RISK FACTORS
Countries	Pregnant women				Blood donors & Adult groups					Aggregate				Notes
Cities and population	Years	place	# tested	# pos	Years	place	cohort	# tested	# pos	# tested	# pos	prev
SENEGAL
Dakar	8788		1400	1	86		hosp.staff	780	4
1490500	8788	Pikine	220	1	88		pris.staff	113	0
1988	89		194	2	88		B.Donors	4194	24
	8990		355	2	8790		B.Donors	18558	45
	91		1859	7	89		B.Donors	227	0
	9192		8384	42	8990		B.Donors	894	4
			12412	55				24766	77	37178	132	0.355049
Ziguinchor	8687	Ziguinchor	260	7	86	Ziguinchor	Adults	280	9
124300	8788	Ziguinchor	550	6	8687	Ziguinchor	hosp.staff	85	0
1988	89	Ziguinchor	173	6	8687	Ziguinchor	B.Donors	84	0
	8990	Ziguinchor	849	14	89	Ziguinchor	B.Donors	221	1
	8687	Ziguinchor	260	7	8990	Ziguinchor	B.Donors	772	3
					8687	Ziguinchor	B.Donors	84	0
			2092	40				1526	13	3618	53	1.4649
Saint Louis	89	Saint Louis	160	0	88	Saint Louis	B.Donors	276	0
113900	8990	Saint Louis	588	0	89	Saint Louis	B.Donors	145	0
1988					8990	Saint Louis	B.Donors	734	0
			748	0				1155	0	1903	0	0
Louga	8788	Louga	184	2
52800
1988			184	2						184	2	1.08696		Rejected (sample size < 200)
Kaolack	89	Kaolack	224	0	89	Kaolack	B.Donors	152	0
151000	8990	Kaolack	685	8	8990	Kaolack	B.Donors	899	2
1988
			909	8				1051	2	1960	10	0.510204
Other cities	85	5 towns	72	3	8587	5 towns	Adults	166	0
					8587	5 towns	Adults	166	0
			72	3				332	0	404	3	0.742574		Rejected (sources do not specify cities)
All urban sites			16417	108				28830	92	45247	200	0.442018
GAMBIA
Banjul					86	Banjul	B.Donors	278	1
169200					88	Banjul	Adults	900	12
1986								1178	13	1178	13	1.10357
Highway					88	Highway	Adults	653	21
25000
1990								653	21	653	21	3.21593
All urban sites			0	0				1831	34	1831	34	1.85691
CAPE VERDE
Praia					88	Praia	Adults	900	13
61600
1990								900	13	900	13	1.44444
All urban sites								900	13	900	13	1.44444
G-BISSAU
Bissau	86		40	7	8587		Adults	50	1
125000	87		535	45	86		Adults	157	14
1988	8788		1892	131	87		B.Donors	280	17
					8790		B.Donors	5649	395
					87		students	430	22
					87		Adults	649	58
					8990		policemen	512	70
			2467	183				7727	577	10194	760	7.45537
Bafatá	8788	Bafatá	258	18
46300
1991			258	18						258	18	6.97674
Other cities		All < 20k inhabitants			8687	ND	hosp.staff	278	45
					8687	ND	military	238	28
					87	ND	B.Donors	54	16
				0				570	89	570	89	15.614		Rejected (sources do not specify cities)
All urban sites			2725	201				8297	666	11022	867	7.86609
GUINEA
Conakry	8587		119	2	8587		Adults	90	0
1112000	8788		216	0	86		Adults	109	0
1986					86		hosp.staff	277	1
					86		military	110	0
					8788		B.Donors	3209	10
					8788		B.Donors	1036	4
					90		B.Donors	1747	3
					91		B.Donors	2003	8
			335	2				8581	26	8916	28	0.314042
Other cities	8788	3 towns	142	0	8889	3 towns	B.Donors	1750	4
					90	3 towns	B.Donors	105	0
					90	6 towns	B.Donors	138	0
					90	7 towns	B.Donors	415	0
					90	var.towns	Adults	1149	4
			142	0				3557	8	3699	8	0.216275		Rejected (sources do not specify cities)
All urban sites			477	2				12138	34	12615	36	0.285375
SIERRA LEONE
Freetown					8792	var.sites	Mid risk	11750	75					This estimate uses the ratio calculated in Part V
(Western province)
525000								11750	75	11750	75	0.638298
1985
Other cities					8789	var.sites	B.Donors	285	14
					91	National	Army recruits	1560	2
								1845	16	1845	16	0.867209		Rejected (sources do not specify cities)
All urban sites								13595	91	13595	91	0.669364
LIBERIA
Monrovia					89		Adults	366	0
668000					87		Adults	179	0
1991
								545	0	545	0	0
Buchanan					87	Buchanan	B.Donors	282	0
25000
1985								282	0	282	0	0
All urban sites								827	0	827	0	0
IVORY COAST
Abidjan	86		331	1	86		B.Donors	500	37
(South region)	87		200	5	87		B.Donors	200	13
2891000	87		268	1	8889		B.Donors	929	29
1988	87		148	7	8990		B.Donors	2127	68
	91		9635	270	91		B.Donors	14137	283
					86		pris.staff	143	1
					86		hosp.staff	42	0
			10582	284				18078	431	28660	715	2.49477
Dabou					8687	Dabou	B.Donors	200	9
(South region)					87	Dabou	B.Donors	471	22
33000					87	Dabou	Adults	195	7
1986
								866	38	866	38	4.38799
Man	87	Man	58	2	85	Man	urban adults	247	4
(West region)					87	Man	Adults	364	8
89600
1988			58	2				611	12	669	14	2.09268
Korhogo					85	Korhogo	Adults	156	1
(North region)					87	Korhogo	Adults	235	1
109400
1988								391	2	391	2	0.511509
Bouaké	87	Bouaké	89	1	85	Bouaké	Adults	169	2
(Center region)					87	Bouaké	Adults	344	2
386000
1988			89	1				513	4	602	5	0.830565
Bondoukou					85	Bondoukou	Adults	226	1
(Northeast region)					87	Bondoukou	Adults	183	5
32200								409	6	409	6	1.46699
1988
Other cities					89	var.towns	Adults	1700	56
								1700	56	1700	56	3.29412		Rejected (sources do not specify cities)
All urban sites			10729	287				22568	549	33297	836	2.51074
GHANA
Accra					86		B.Donors	287	0
(Greater Accra region)		All rural sites			8990		Adults	727	2
1390000
1988								1014	2	1014	2	0.197239
Other cities					90	var.towns	B.Donors	842	8
					8990	East, mostly urban	Adults	602	9
								1444	17	1444	17	1.17729		Rejected (sources do not specify cities)
All urban sites			0	0				2458	19	2458	19	0.772986
BURKINA-FASO
Ouagadougou	86		58	1	8586		Adults	303	0
(Center region)
613000			58	1				303	0	361	1	0.277008
1990
Bobo-Dioulasso	9091	B-Dioulasso	125	7	88	B-Dioulasso	Adults	281	6
(Haux Bassins region)
264600			125	7				281	6	406	13	3.20197
1990
Banfora	8789	Banfora	1400	20
(Cascades region)	8791	Banfora	2300	25
58000			3700	45						3700	45	1.21622
1990
All urban sites			3883	53				584	6	4467	59	1.3208
MALI
Bamako	87		283	3	87		B.Donors	139	1
658300	87		573	8	8889		B.Donors	160	4
1987	8990		304	0
			1160	11				299	5	1459	16	1.09664
Other cities	87	var. towns	588	5
			588	5						588	5	0.85034		Rejected (sources do not specify cities)
All urban sites			1748	16				299	5	2047	21	1.02589
TOGO
Lomé	88		407	2	88		B.Donors	5514	5
500000					89		B.Donors	1144	11
1987
			407	2				6658	16	7065	18	0.254777
All urban sites			407	2				6658	16	7065	18	0.254777
BENIN
Cotonou	87		83	0	87		B.Donors	36	0
(Littoral region)					87		hosp.staff	126	1
536800					87		military	100	0
1992			83	0				262	1	345	1	0.289855
Porto Novo/Dangbo	91	Dangbo	300	0
(Ouemé region)
40000			300	0						300	0	0
1991
All urban sites			383	0				262	1	645	1	0.155039
NIGERIA
Lagos					86		B.Donors	261	0
(Southwest region)					86		B.Donors	560	0
3800000					87		B.Donors	595	0
1987					8889		B.Donors	4689	2
					8889		students	155	0
								6260	2	6260	2	0.0319489
Ibadan	86		200	0	86		B.Donors	2000	0
(Southwest region)					8789		B.Donors	5720	0
1662000					8787		Adults	324	1
1987					8590		B.Donors	1640	15
			200	0				9684	16	9884	16	0.161878		Rejected (only Lagos included)
Calabar					86		B.Donors	296	0
(South South region)					87		B.Donors	494	0
282000					88		B.Donors	376	0
1987					24		hosp.staff	24	0
								1190	0	1190	0	0		Rejected (only Lagos included)
Zaria					86	Zaria	B.Donors	500	0
(Northwest region)
612300								500	0	500	0	0		Rejected (only Lagos included)
1991
Maiduguri					88	Maiduguri	Adults	160	0
(Northeast region)
560000								160	0	160	0	0		Rejected (sample size < 200)
1987
Ogbomosho					8590	Ogbomosho	hosp.staff	151	0
(Southwest region)
582900								151	0	151	0	0		Rejected (sample size < 200)
1987
Other cities	8990	3 cities	409	0	8689	National	Adults	8000	96
					8990	3 cities	B.Donors	281	0
			409	0				8281	96	8690	96	1.10472		Rejected (sources do not specify cities)
All urban sites			609	0				26226	114	26835	114	0.424818
NIGER
Niamey	8788		1477	6	8788		B.Donors	8406	34
550000					89		B.Donors	5513	22
1988					90		B.Donors	2051	6
					8788		Adults	1083	14
					90		Adults	362	2
			1477	6				17415	78	18892	84	0.444633
All urban sites			1477	6				17415	78	18892	84	0.444633
MAURITANIA
Nouakchott	85		239	0	85		B.Donors	246	0
393300	8788		56	0	8788		B.Donors	81	1
1988					86		hosp.staff	21	0
			295	0				348	1	643	1	0.155521
Nouadhibou					8788	Nouadhibou	hosp.staff	38	0
59200
1988								38	0	38	0	0		Rejected (sample size < 200)
Other cities	8587		27	0	8587		Adults	27	0
			27	0				27	0	54	0	0		Rejected (sources do not specify cities)
All urban sites			322	0				413	1	735	1	0.136054
PART III	TOTALS PER COUNTRY
		Urban cohorts
Country		# tested	#pos	prev
Senegal		45247	200	0.442018
Gambia		1831	34	1.85691
Cape Verde		900	13	1.44444
Guinea Bissau		11022	867	7.86609
Guinea		12615	36	0.285375
Sierra Leone		13595	91	0.669364
Liberia		827	0	0
Ivory Coast		33297	836	2.51074
Ghana		2458	19	0.772986
Burkina Faso		4467	59	1.3208
Mali		2047	21	1.02589
Togo		7065	18	0.254777
Benin		645	1	0.155039
Nigeria		26835	114	0.424818
Niger		18892	84	0.444633
Mauritania		735	1	0.136054
Total urban		182478	2394	1.31194
PART IV	PREVALENCE RATES IN COMMERCIAL SEX WORKERS COHORTS
	CSWs
Country	Years	place	# tested	# pos	prev
Senegal	85	Dakar	289	20	6.92042
	86	Dakar	437	34	7.78032
	86	Ziguinchor	67	30	44.7761
	8688	Dakar	1092	127	11.63
	8688	Thiès	64	4	6.25
	8688	Louga	14	3	21.4286
	8688	Saint Louis	65	1	1.53846
	87	Dakar	763	79	10.3539
	87	Ziguinchor	105	44	41.9048
	87	Kaolack	104	30	28.8462
	88	Dakar	1166	112	9.60549
	88	Ziguinchor	200	84	42
	89	Dakar	1394	146	10.4735
	8990	Thiès	120	13	10.8333
	8990	Dakar	622	35	5.62701
	8990	Kaolack	164	37	22.561
	8990	Saint Louis	108	8	7.40741
	8990	Ziguinchor	231	48	20.7792
	90	Dakar	118	11	9.32203
	90	Ziguinchor	250	103	41.2
	90	Kaolack	214	63	29.4393
	90	Dakar	360	25	6.94444
	9091	Dakar	190	19	10
Gambia	85	Basse Town	31	1	3.22581
	88	5 towns	355	95	26.7606
	89	5 towns	241	69	28.6307
	90	Banjul	104	16	15.3846
Cape Verde
Guinea Bissau	86	Bissau	39	25	64.1026
	87	Bissau	30	11	36.6667
	88	Urban	26	13	50
Guinea	8587	Conakry	30	0	0
Sierra Leone
Liberia	87	Monrovia	30	0	0
Ivory Coast	86	Abidjan	101	18	17.8218
	86	Tortiya	131	23	17.5573
	87	Abidjan	105	18	17.1429
	87	Bouaké	56	27	48.2143
	87	Odienné	104	23	22.1154
	88	Abidjan	37	10	27.027
	89	Abidjan	120	18	15
	90	Abidjan	72	20	27.7778
Ghana
Burkina Faso	87	Ouagadougou	308	63	20.4545
	88	Ouagadougou	268	28	10.4478
	89	Ouagadougou	292	59	20.2055
	90	Mines in N	38	9	23.6842
Mali	87	Bamako	230	63	27.3913
	89	Bamako	115	55	47.8261
	91	Bamako	103	9	8.73786
Togo	86	Tema	79	9	11.3924
Benin	87	Cotonou	133	5	3.7594
	90	Pce Atlantique	75	10	13.3333
	90	Pce Ouemé	188	11	5.85106
	90	Pce Zou	40	4	10
Nigeria	86	Lagos	100	3	3
	87	Maiduguri	386	2	0.518135
	87	Calabar	27	0	0
	88	Calabar	329	0	0
	88	Maiduguri	165	2	1.21212
	88	Calabar	38	1	2.63158
	8889	Lagos	117	1	0.854701
	89	Calabar	55	1	1.81818
	89	Rural	265	0	0
	89	Enugu	59	0	0
	90	Lagos	546	16	2.9304
Niger	8788	Niamey	610	16	2.62295
Mauritania
Total			14315	1830	12.7838
PART V	TOTALS INCLUDING CSWs AND RATIO OF PREVALENCE EXCLUDING CSWs/INCLUDING CSWs
		# tested	# pos	prev
Adults without risk factors
Total urban		182478	2394	1.31194		From Part III
Total rural		77671	677	0.871625		From the same sources (details not listed in this file)
Total urban + rural		260149	3071	1.18048
Total CSWs		14315	1830	12.7838		From Part IV
Total including CSWs		274464	4901	1.78566
Ratio exclCSW/inclCSW				0.661087		This ratio is used to estimate the prevalence in Freetown
PART VI	REFERENCES
Adu-Sarkodie Y, Tetteh C, Appiah-Denkyira E (1996) Infrequent Occurrence of HIV-2 in Blood Donors and Pregnant Women in a Rural Community in Ghana. Sex Transm Dis 23: 526–527.
Andreasson PA, Dias F, Teixeira Goudiaby JM, Naucler A, Biberfeld G (1989). HIV-2 infection in prenatal women in Guinea-Bissau. 5th International Conference on AIDS. Jun 4–9, 1989. 5: 1000, abstract no. M.G.P.16.
Brun-Vézinet F, Delaporte E, Simon F, Dazza MC, Peeters M, et al. (1988) Épidemiologie de l'Infection HIV-2 en Afrique. Médecine et Maladies Infectieuses 18: 698–701.
Chen Z, Luckay A, Sodora DL, Telfer P, Reed P, et al. (1997) Human Immunodeficiency Virus Type 2 (HIV-2) Seroprevalence and Characterization of a Distinct HIV-2 Genetic Subtype from the Natural Range of Simian Immunodeficiency Virus-Infected Sooty Mangabeys. J Virol 71: 3953–3960.
De Cock KM, Brun-Vézinet F (1989) Epidemiology of HIV-2 infection. AIDS 3(Suppl 1): S89–S95.
De Cock KM, Brun-Vézinet F, Soro B (1991) HIV-1 and HIV-2 infections and AIDS in West Africa. AIDS 5(Suppl 1): S21–S28.
Djomand G, Greenberg AE, Sassan-Morokro M, Tossou O, Diallo MO, et al. (1995) The Epidemic of HIV/AIDS in Abidjan, Côte d'Ivoire: A Review of Data Collected by Project RETRO-CI from 1987 to 1993. J Acquir Immune Defic Syndr 10: 358–365.
Gao F, Yue L, White AT, Pappas PG, Barchue J, et al. (1992) Human infection by genetically diverse SIVSM-related HIV-2 in West Africa. Nature 358: 495–499.
Harry TO, Ekenna O, Chikwem JO, Mohammed I, Sakwa M, et al. (1993) Seroepidemiology of Human Immunodeficiency Virus Infection in Borno State of Nigeria by Sentinel Surveillance. J Acquir Immune Def Syndr 6: 99–103.
Kosia A, Stevens T, Kargbo A (1993) Epidemiology of HIV-2 in Sierra Leone. 9th International Conference on AIDS, June 6-11, 1993. 9: 676, abstract no. PO-C07-2752.
Lahmeyer J (2006) Population Statistics: historical demography of all countries, their divisions and towns. Available: http://www.populstat.info.
Lakiss S, Kourouma K, Diallo MP, Sabbatani S, Rezza G, et al. (1991) HIV-1/2 seroprevalence in Guinea Conakry. 7th International Conference on AIDS, June 16-21, 1991. 7: 373, abstract no. M.C.3300.
Maiga MA, Turcotte F, Doucouré A, Sanogo B, Sidibé D, et al. (1992) Séroprévalence des anticorps contre le virus de l'immunodeficience humaine (VIH) chez les femmes enceintes de Bamako et de Sélingué (Mali). Médecine d'Afrique Noire 39: 94–98.
Mohammed I, Nasidi A, Chikwem JO, Williams EE, Harry TO, et al. (1988) HIV infection in Nigeria. AIDS 2: 61–64.
Neequaye AR, Neequaye JE, Biggar RJ, Mingle JAA, Drummond J, et al. (1997) HIV-1 and HIV-2 in Ghana, West Africa: Community surveys compared to surveys of pregnant women. West Afr J Med 16: 102–108.
Oelman B, Wilkins HA, Hughes A, Whittle H, Jaiteh KO, et al. (1989) The epidemiology of HIV1 and HIV2 in the Gambia, West Africa. 5th International Conference on AIDS, June 4-9, 1989. 5: 1008, abstract no. T.G.P.30.
Olaleye OD, Bernstein L, Ekweozor CC, Sheng Z, Omilabu SA, et al. (1993) Prevalence of Human Immunodeficiency Virus Types 1 and 2 in Nigeria. J Inf Dis 167: 710–714.
Rémy G (1993). Image Géographique des Infections à VIH en Afrique de l’Ouest: Faits et Interrogations. Médecine d'Afrique Noire 40(1): 15–21; 40(2): 81–95; 40(3): 161–168.
Rodier MH, Berthonneau J, Bourgoin A, Giraudeau G, Agius G, et al. (1995) Seroprevalences of toxoplasma, malaria, rubella, cytomegalovirus, HIV and treponemal infections among pregnant women in Cotonou, Republic of Benin. Acta Tropica 59: 271–277.
Sangaré L, Meda N, Lankoandé S, Van Dyck E, Cartoux M, et al. (1997) HIV infection among pregnant women in Burkina Faso: a nationwide survey. Int J STD & AIDS 8: 646–651.
Schim van der Loeff MF, Aaby P (1999) Towards a better understanding of the epidemiology of HIV-2. AIDS 13(Suppl A): S69–S84.
Schim van der Loeff MF (2003) HIV-2 in West Africa. Epidemiological studies. University of Amsterdam, Thesis Dissertation, FileID 69013, http://dara.uva.nl/document/69013
Schim van der Loeff MF, Sarge-Njie R, Ceesay S, Awasana AA, Jaye P, et al. (2003) Regional differences in HIV trends in The Gambia: results from sentinel surveillance among pregnant women. AIDS 17: 1841–1846.
United States Bureau of the Census (1993) Recent HIV seroprevalence levels by country: June 1993. Washington DC: Health Studies Branch, Center for International Research, US Bureau of the Census, Research Note no. 9.
United States Bureau of the Census (1996) Recent HIV seroprevalence levels by country: June 1996. Washington DC: Health Studies Branch, International Programs Center, US Bureau of the Census, Research Note no. 21.
Wilkins A, Hayes R, Alonso P, Baldeh S, Berry N, et al. (1991) Risk factors for HIV-2 infection in The Gambia. AIDS 5: 1127–1132.
Williams EE, Mohammed I, Chikwem JO, Akinsete R, Udofia O, et al. (1990) HIV-1 and HIV-2 antibodies in Nigerian populations with high- and low-risk behaviour patterns. AIDS 4: 1041–1042.
