# Supplementary material for: Male Circumcision and the Epidemic Emergence of HIV-2 in West Africa
Source: PLoS One. 2016 Dec 7;11(12):e0166805. doi: 10.1371/journal.pone.0166805 (PMC5142780; doi:10.1371/journal.pone.0166805)
Supplement: S3 Dataset — (XLSX) [file pone.0166805.s005.xlsx]

## Sheet: Folha1
Male Circumcision and the Epidemic Emergence of HIV-2 in West Africa
João Dinis Sousa, Marina Padrão Temudo, Barry Stephen Hewlett, Ricardo Jorge Camacho, Viktor Müller, Anne-Mieke Vandamme, 2016
Supporting Information S3 Dataset: List of tables of ethnic partition of population of cities
DATASET WITH LIST OF TABLES OF ETHNIC PARTITION OF POPULATION OF CITIES AND HIV-2 PREVALENCE RATES
EXPLANATION
Each line of this Dataset points to a table of ethnic partition of population (TEPP). Each TEPP refers to a city at a given time, for which there is information on the ethnic distribution/partition of its population, for a given time. The full data of the TEPPs, including the discrimination of the ethnic groups, is developed in S4 Dataset. In the right side of the table there is information on HI…
		TEPP information								HIV-2 information
	Number	City	City	Country	Partition	Year	Epoch	Sooty	City	Number	HIV-2	HIV-2	Year
			code	code	code	part			size	samples	pos	prev	sampl
	num	city	cicode	cocode	pacode	ypart	epoch	sooty	cisize	nsamp	nhiv2	phiv2	ysamp
	1	Abidjan	ab	IVORY	ABID55	1955	1	1	1	28660	715	2.49477	1991
	2	Abidjan	ab	IVORY	ABID36	1936	3	1	1	28660	715	2.49477	1991
	3	Bouake	bk	IVORY	BOUA58	1958	1	1	2	602	5	0.830565	1986
	4	Bouake	bk	IVORY	BOUA30	1930	3	1	2	602	5	0.830565	1986
	5	Man	mn	IVORY	MAN075	1975	2	1	3	669	14	2.09268	1986
	6	Bondoukou	bo	IVORY	BOND75	1975	2	2	3	409	6	1.46699	1986
	7	Korhogo	kg	IVORY	KORH75	1975	2	2	3	391	2	0.511509	1986
	8	Dabou	db	IVORY	DABO75	1975	2	1	3	866	38	4.38799	1987
	9	Monrovia	mo	LIBER	MONR58	1958	1	1	1	545	0	0	1988
	10	Monrovia	mo	LIBER	MONR39	1939	3	1	1	545	0	0	1988
	11	Buchanan	bu	LIBER	BUCH58	1958	1	1	3	282	0	0	1987
	12	Buchanan	bu	LIBER	BUCH39	1939	3	1	3	282	0	0	1987
	13	Freetown	fr	SLEON	FREE63	1963	1	1	1	11750	75	0.638298	1989
	14	Freetown	fr	SLEON	FREE31	1931	3	1	1	11750	75	0.638298	1989
	15	Conakry	cy	GUINE	CONA50	1950	1	1	1	8916	28	0.314042	1988
	16	Conakry	cy	GUINE	CONA36	1936	3	1	1	8916	28	0.314042	1988
	17	Bissau	bi	GBISS	BISS60	1960	1	1	1	10194	760	7.45537	1988
	18	Bissau	bi	GBISS	BISS33	1933	3	1	1	10194	760	7.45537	1988
	19	Bafata	bt	GBISS	BAFA60	1960	2	1	3	258	18	6.97674	1987
	20	Dakar	dk	SENEG	DAKA61	1961	1	1	1	37178	132	0.355049	1989
	21	Dakar	dk	SENEG	DAKA34	1934	3	1	1	37178	132	0.355049	1989
	22	SaintLouis	sl	SENEG	SLOU61	1961	2	2	2	1903	0	0	1989
	23	Kaolack	kl	SENEG	KAOL97	1997	2	2	2	1960	10	0.510204	1989
	24	Ziguinchor	zi	SENEG	ZIGU81	1981	2	1	3	3618	53	1.4649	1989
	25	Banjul	bj	GAMBI	BANJ44	1944	1	1	1	1178	15	1.27334	1987
	26	Banjul	bj	GAMBI	BANJ30	1930	3	1	1	1178	15	1.27334	1987
	27	Highway	hw	GAMBI	HIGH88	1988	2	1	3	653	21	3.21593	1988
	28	Praia	pr	CVERD	PRAI60	1960	2	2	1	900	13	1.44444	1988
	29	Nouakchott	nk	MAURI	NOUA65	1965	2	0	1	643	1	0.155521	1986
	30	Bamako	bm	MALI0	BAMA60	1960	2	2	1	1459	16	1.09664	1988
	31	Ouagadougou	ou	BFASO	OUAG62	1962	2	2	1	361	1	0.277008	1986
	32	BoboDioulasso	bd	BFASO	BDIO05	1905	2	2	2	406	13	3.20197	1989
	33	Banfora	bf	BFASO	BANF05	1905	2	2	3	3700	45	1.21622	1989
	34	Accra	ac	GHANA	ACCR48	1948	1	2	1	1014	2	0.197239	1989
	35	Accra	ac	GHANA	ACCR31	1931	3	2	1	1014	2	0.197239	1989
	36	Lome	lm	TOGO0	LOME56	1956	2	0	1	7065	18	0.254777	1988
	37	Cotonou	ct	BENIN	COTO52	1952	2	0	1	345	1	0.289855	1987
	38	PortoNovo	pn	BENIN	PNOV52	1952	2	0	2	300	0	0	1991
	39	Lagos	lg	NGRIA	LAGO51	1951	2	0	1	6250	2	0.032	1988
	40	Niamey	ni	NIGER	NIAM61	1961	1	0	1	18892	84	0.444633	1988
	41	Niamey	ni	NIGER	NIAM45	1945	3	0	1	18892	84	0.444633	1988
